# Supplementary material
Source: Springer Nature journal article supplement (https://www.springermedizin.de/resource/supplementary/12933_2002_3_MOESM2_ESM.pdf/9538100)
Supplement: MOESM2 [file 9538100]

**INJURIOUS  
STIMULI.**

**INTIMAL REDOX STRESS**

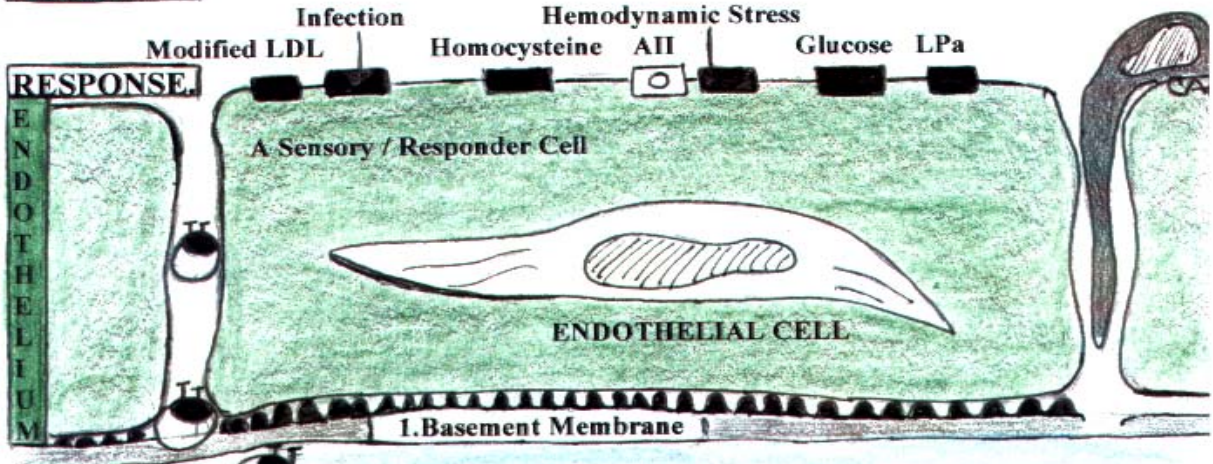

**ADAPTIVE  
CHANGES.**

ox.LDL-C

[REMODELING]

Gly. LDL-C

INTIMA

2. Elastin

E.C.M. [1.-5.]

**INTIMAL REDOX STRESS**

- 4. S. Glycoproteins
- 5. Proteoglycans

3. Collagen

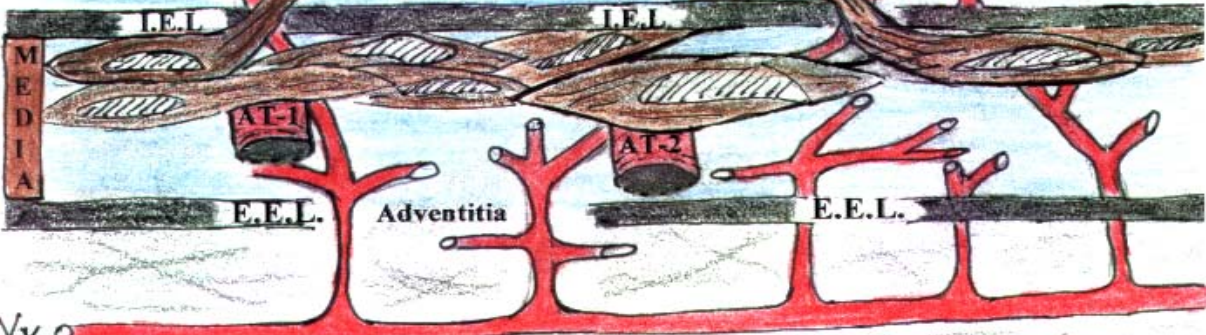

V.v.o

ph 97
